# Supplementary material for: A Transcriptomic Biomarker to Quantify Systemic Inflammation in Sepsis — A Prospective Multicenter Phase II Diagnostic Study
Source: PubMed Central journal article supplement — eBioMedicine. 2016 Mar 8;6:114–25. doi: 10.1016/j.ebiom.2016.03.006 (PMC4856796; doi:10.1016/j.ebiom.2016.03.006), 2016-03-08
Supplement: mmc2.pdf [file mmc2.pdf]

## **Studienprotokoll**

### **Evaluierung eines Transkriptom-basierten Immunmonitorings (SIQNATURE®) und einer PCR zum Nachweis mikrobieller DNA (VYOO®) bei kritisch Kranken**

*Kurztitel: SIQICU*

#### **Studienleitung**

Prof. Dr. med. M. Bauer  
Klinik für Anästhesiologie und  
Intensivtherapie (KAI)  
Klinikum der FSU Jena  
Erlanger Allee 101  
07747 Jena

Datum der Fassung: 21.04.2009

Status der Fassung: Final

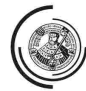

## Inhaltsverzeichnis

|          |                                                    |           |
|----------|----------------------------------------------------|-----------|
| <b>1</b> | <b>Allgemeine Informationen</b>                    | <b>3</b>  |
| 1.1      | Verantwortliche Personen                           | 3         |
| 1.2      | Prüfplan-Synopse                                   | 5         |
| 1.3      | Studienablauf                                      | 7         |
| <b>2</b> | <b>Rationale und Fragestellung</b>                 | <b>8</b>  |
| <b>3</b> | <b>Studienziele</b>                                | <b>10</b> |
| 3.1      | Primäres Ziel                                      | 10        |
| 3.2      | Sekundäre Ziele                                    | 10        |
| <b>4</b> | <b>Studienbeschreibung</b>                         | <b>10</b> |
| 4.1      | Studiendesign                                      | 10        |
| 4.2      | Erwartete Studiendauer                             | 11        |
| <b>5</b> | <b>Studienpopulation</b>                           | <b>11</b> |
| 5.1      | Einschlusskriterien                                | 11        |
| 5.2      | Ausschlusskriterien                                | 11        |
| <b>6</b> | <b>Individueller Studienablauf</b>                 | <b>12</b> |
| 6.1      | Prüfung der Ein- und Ausschlusskriterien           | 12        |
| 6.2      | Einwilligungserklärung                             | 12        |
| 6.3      | Beschreibung des Studienablaufes                   | 13        |
| <b>7</b> | <b>Verfahren zur Diagnostik und Datengewinnung</b> | <b>14</b> |
| 7.1      | Der SIGNATURE®-Test                                | 14        |
| 7.2      | Der VYOO®-Test                                     | 15        |
| <b>8</b> | <b>Dokumentation</b>                               | <b>16</b> |
| <b>9</b> | <b>Literatur</b>                                   | <b>16</b> |



# 1 Allgemeine Informationen

## 1.1 Verantwortliche Personen

|                             |                                                                                                                                                                                                                                                                                                                                                                                                                                                                                                                                                                                                                                                                               |
|-----------------------------|-------------------------------------------------------------------------------------------------------------------------------------------------------------------------------------------------------------------------------------------------------------------------------------------------------------------------------------------------------------------------------------------------------------------------------------------------------------------------------------------------------------------------------------------------------------------------------------------------------------------------------------------------------------------------------|
| <b>Studienleitung:</b>      | <b>Prof. Dr. med. M. Bauer</b><br>Klinik für Anästhesiologie und Intensivtherapie (KAI)<br>Universitätsklinikum Jena<br>Erlanger Allee 101<br>07747 Jena<br>Tel.: 03641- 9323111, FAX: 03641 - 9323102<br>E-Mail: <a href="mailto:michael.bauer@med.uni-jena.de">michael.bauer@med.uni-jena.de</a>                                                                                                                                                                                                                                                                                                                                                                            |
| <b>Studienkoordination:</b> | <b>Dr. med. F. Bloos, Ph.D.<sup>„U.W.O.“</sup> (KAI)</b><br>Tel.: 03641- 9323283; Fax: 03641 – 934795<br>E-Mail: <a href="mailto:frank.bloos@med.uni-jena.de">frank.bloos@med.uni-jena.de</a><br><b>Dr. med. A. Kortgen (KAI)</b><br>Tel.: 03641 – 9323 184<br>E-Mail: <a href="mailto:andreas.kortgen@med.uni-jena.de">andreas.kortgen@med.uni-jena.de</a><br><b>K. Ludewig (KAI)</b><br>Tel: 03641 – 9323 378<br>E-Mail: <a href="mailto:katrin.ludewig@med.uni-jena.de">katrin.ludewig@med.uni-jena.de</a><br><b>Dipl. Biol. S. Sachse (Mikrobiologie)</b><br>Tel.: 03641-9393 614<br>E-Mail: <a href="mailto:svea.sachse@med.uni-jena.de">svea.sachse@med.uni-jena.de</a> |
| <b>Datenerhebung:</b>       | <b>P. Bloos</b> (E-mail: <a href="mailto:petra.bloos@med.uni-jena.de">petra.bloos@med.uni-jena.de</a> )<br><b>A. Braune</b> (E-Mail: <a href="mailto:anke.braune@med.uni-jena.de">anke.braune@med.uni-jena.de</a> )<br><b>D. Fergen</b> (E-Mail: <a href="mailto:daniela.fergen@med.uni-jena.de">daniela.fergen@med.uni-jena.de</a> )<br><b>U. Redlich</b> (E-Mail: <a href="mailto:ulrike.redlich@med.uni-jena.de">ulrike.redlich@med.uni-jena.de</a> )<br>Tel: 03641 – 9323 385/6/9<br>Fax: 03641 – 9323387                                                                                                                                                                 |

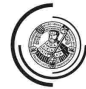

|                                   |                                                                                                                                                                                                                                                                                                                                                                                                                                                                                                                                                                                                                                                                                                                                                                                                                                                                                                                                                                                                                                                                                                                                                                                                                        |
|-----------------------------------|------------------------------------------------------------------------------------------------------------------------------------------------------------------------------------------------------------------------------------------------------------------------------------------------------------------------------------------------------------------------------------------------------------------------------------------------------------------------------------------------------------------------------------------------------------------------------------------------------------------------------------------------------------------------------------------------------------------------------------------------------------------------------------------------------------------------------------------------------------------------------------------------------------------------------------------------------------------------------------------------------------------------------------------------------------------------------------------------------------------------------------------------------------------------------------------------------------------------|
| <p><b>Laboruntersuchungen</b></p> | <p><b>SIQNAURE®</b><br/><b>SIRS-Lab GmbH</b><br/>Winzerlaer Str. 2<br/>07745 Jena<br/><u>Ansprechpartnerin:</u><br/>Dr. Britta Wlotzka<br/>Tel.: 03641-508 430; Fax: 03641-508 432<br/>Email: <a href="mailto:wlotzka@sirs-lab.com">wlotzka@sirs-lab.com</a></p> <p><b>VYOO®</b><br/><b>Institut für Mikrobiologie</b><br/>Universitätsklinikum Jena<br/>Erlanger Allee 101<br/>07747 Jena<br/><u>Ansprechpartnerin:</u><br/>Svea Sachse<br/>Tel.: 03641-9393 614; Fax: 03641-9393 502<br/>E-Mail: <a href="mailto:svea.sachse@med.uni-jena.de">svea.sachse@med.uni-jena.de</a></p>                                                                                                                                                                                                                                                                                                                                                                                                                                                                                                                                                                                                                                    |
| <p><b>Kooperationspartner</b></p> | <p><b>Prof. Dr. med. E. Straube</b><br/>Institut für Medizinische Mikrobiologie<br/>Universitätsklinikum Jena<br/>Erlanger Allee 101<br/>07747 Jena<br/>Tel.: 03641-9393500<br/>Email: <a href="mailto:eberhard.straube@med.uni-jena.de">eberhard.straube@med.uni-jena.de</a></p> <p><b>Prof. Dr. med. U. Settmacher</b><br/>Klinik für Allgemein-, Viszeral- und Gefäßchirurgie<br/>Universitätsklinikum Jena<br/>Erlanger Allee 101<br/>07747 Jena<br/>Tel: 03641-932 26 01, Fax: 03641 932 26 02<br/>Email: <a href="mailto:utz.settmacher@med.uni-jena.de">utz.settmacher@med.uni-jena.de</a></p> <p><b>Prof. Dr. med. A. Lichtenberg</b><br/>Klinik für Herz- und Thoraxchirurgie<br/>Universitätsklinikum Jena<br/>Erlanger Allee 101<br/>07747 Jena<br/>Tel: 03641-9322901, Fax: 0 3641-9 32 29 02<br/>Email: <a href="mailto:artur.lichtenberg@med.uni-jena.de">artur.lichtenberg@med.uni-jena.de</a></p> <p><b>Prof. Dr. med. H. R. Figulla</b><br/>Klinik für Innere Medizin I<br/>Universitätsklinikum Jena<br/>Erlanger Allee 101<br/>07747 Jena<br/>Tel: 03641- 9324101, Fax: 0 3641- 9324102<br/>Email: <a href="mailto:hans-reiner.figulla@med.uni-jena.de">hans-reiner.figulla@med.uni-jena.de</a></p> |



## 1.2 Prüfplan-Synopse

|                                    |                                                                                                                                                                                                                                                                                                                                                                                                                                                                                                                                                                                                                                                                                                                                                                                                                                                                                                   |
|------------------------------------|---------------------------------------------------------------------------------------------------------------------------------------------------------------------------------------------------------------------------------------------------------------------------------------------------------------------------------------------------------------------------------------------------------------------------------------------------------------------------------------------------------------------------------------------------------------------------------------------------------------------------------------------------------------------------------------------------------------------------------------------------------------------------------------------------------------------------------------------------------------------------------------------------|
| <b>Titel der Studie:</b>           | Evaluierung eines Transkriptom-basierten Immunmonitorings (SIQNAURE®) und einer PCR zum Nachweis mikrobieller DNA (VYOO®) bei kritisch Kranken                                                                                                                                                                                                                                                                                                                                                                                                                                                                                                                                                                                                                                                                                                                                                    |
| <b>Kurzbezeichnung der Studie:</b> | SIQICU                                                                                                                                                                                                                                                                                                                                                                                                                                                                                                                                                                                                                                                                                                                                                                                                                                                                                            |
| <b>Indikation:</b>                 | Perioperative Intensivpatienten mit hohem Infektionsrisiko                                                                                                                                                                                                                                                                                                                                                                                                                                                                                                                                                                                                                                                                                                                                                                                                                                        |
| <b>Primäres Ziel der Studie:</b>   | Korrelation SIQ-Score® mit der klinischen Diagnose (SIRS, Sepsis, schwere Sepsis, septischer Schock)                                                                                                                                                                                                                                                                                                                                                                                                                                                                                                                                                                                                                                                                                                                                                                                              |
| <b>Sekundäre Ziele der Studie:</b> | <ul style="list-style-type: none"> <li>▪ Korrelation von SIQNAURE® mit Organdysfunktionen (SOFA-Score)</li> <li>▪ Korrelation von SIQNAURE® mit Inflammationsmarkern</li> <li>▪ Korrelation von SIQNAURE® mit ITS-Liegezeit und ITS/Krankenhaus-Letalität</li> <li>▪ Häufigkeit positiver VYOO®-Tests bei positivem SIQNAURE®</li> <li>▪ Korrelation VYOO® mit Blutkultur</li> <li>▪ Korrelation VYOO® mit anderen mikrobiologischen Nachweisen vom Ort der Infektion</li> <li>▪ Korrelation von VYOO® mit Organdysfunktionen (SOFA-Score)</li> <li>▪ Korrelation von VYOO® mit Inflammationsmarkern</li> <li>▪ Korrelation von VYOO® mit ITS-Liegezeit und ITS/Krankenhaus-Letalität</li> </ul>                                                                                                                                                                                                  |
| <b>Studiendesign:</b>              | Prospektive, monozentrische, unkontrollierte Kohortenstudie                                                                                                                                                                                                                                                                                                                                                                                                                                                                                                                                                                                                                                                                                                                                                                                                                                       |
| <b>Studienpopulation:</b>          | <u>Einschlusskriterien:</u> <ul style="list-style-type: none"> <li>• ITS-Aufnahme aufgrund einer der folgenden Erkrankungen <ul style="list-style-type: none"> <li>○ Hohes Risiko für die Entwicklung einer Sepsis: <ul style="list-style-type: none"> <li>▪ Leber-Transplantation</li> <li>▪ Niere-Pankreastransplantation</li> <li>▪ Ösophagusresektion</li> <li>▪ Pankreaskopfresektion (z.B. Whipple-OP)</li> <li>▪ Notfalllaparotomie (einschl. diagnostischer Laparotomie)</li> <li>▪ Kardiochirurgischer Kombinationseingriff</li> <li>▪ Aufnahme über die Zentrale Notaufnahme</li> <li>▪ Wiederaufnahme eines ITS-Patienten</li> </ul> </li> <li>Oder</li> <li>○ Patienten mit manifester Infektion <ul style="list-style-type: none"> <li>▪ Endokarditis</li> <li>▪ Pneumonie</li> <li>▪ Schwere Sepsis/ septischer Schock (nicht älter als 48 Std.)</li> </ul> </li> </ul> </li> </ul> |



|                         |                                                                                                                                                                                                                                                                                                         |
|-------------------------|---------------------------------------------------------------------------------------------------------------------------------------------------------------------------------------------------------------------------------------------------------------------------------------------------------|
|                         | <u>Ausschlusskriterien:</u> <ul style="list-style-type: none"> <li>• Alter &lt;18 Jahre</li> <li>• Schwangere oder stillende Frauen</li> <li>• Einverständniserklärung nicht einholbar</li> <li>• Patienten mit Therapieeinschränkung (z.B. DNR)</li> <li>• Patienten mit infauster Prognose</li> </ul> |
| <b>Patientenzahl:</b>   | 500 (max. 10 Patienten nach Transplantation)                                                                                                                                                                                                                                                            |
| <b>Studienmaßnahmen</b> | Blutentnahmen über 10 Tagen für SIGNATURE® (Transkriptom-basierter Test zur Differenzierung eines SIRS infektiöser von einem SIRS nicht-infektiöser Genese). Bei klinischer Indikation Abnahme einer Blutkultur und VYOO® (PCR basierter Erregernachweis).                                              |
| <b>Zeitplan:</b>        | Geplante Studiendauer: 24 Monate                                                                                                                                                                                                                                                                        |



### 1.3 Studienablauf

|                                      | S | B              | 1              | 2              | 3              | 4              | 5              | 6              | 7              | 8              | 9              | N | N+1..9         |
|--------------------------------------|---|----------------|----------------|----------------|----------------|----------------|----------------|----------------|----------------|----------------|----------------|---|----------------|
| Ein- und Ausschlusskriterien         | X |                |                |                |                |                |                |                |                |                |                |   |                |
| Randomisierung                       |   | X              |                |                |                |                |                |                |                |                |                |   |                |
| Demographische Erhebung              |   | X              |                |                |                |                |                |                |                |                |                |   |                |
| Diagnosen, Nebendiagnosen            |   | X              |                |                |                |                |                |                |                |                |                |   |                |
| Chirurgische Eingriffe               |   | X              | X              | X              | X              | X              | X              | X              | X              | X              | X              | X | X              |
| APACHE II-Score u. SAPS-II           |   | X              |                |                |                |                |                |                |                |                |                |   |                |
| Laborwerte                           |   | X              | X              | X              | X              | X              | X              | X              | X              | X              | X              | X | X              |
| Organfunktionen, SOFA-Score          |   | X              | X              | X              | X              | X              | X              | X              | X              | X              | X              | X | X              |
| Check Sepsiskriterien, Infektionen   |   | X              | X              | X              | X              | X              | X              | X              | X              | X              | X              | X | X              |
| Erfassung der Begleitmedikation      |   | X              | X              | X              | X              | X              | X              | X              | X              | X              | X              | X | X              |
| Ergebnisse mikrobiol. Untersuchungen |   | X              | X              | X              | X              | X              | X              | X              | X              | X              | X              | X | X              |
| SIQNAURE®                            |   | X              | X              | X              | X              | X              | X              | X              | X              | X              | X              | X | X              |
| VYOO®/Blutkultur                     |   | X <sup>1</sup> | X | X <sup>1</sup> |

S: Screening; B: Baseline; N: new episode of sepsis

Bei Patienten ohne SIRS-Kriterien, ohne Anhalt für eine Infektion und einem SOFA  $\leq 4$  wird die Visiten (Tage 1-9) nicht durchgeführt.

<sup>1</sup> nur wenn Blutkultur aus klinischer Indikation notwendig ist.



## 2 Rationale und Fragestellung

Sepsis ist definiert als eine systemische Entzündungsreaktion ausgelöst durch einen mikrobiologischen Erreger. Diese Definition wurde in einer Konsensuskonferenz des American College of Chest Physicians und der Society of Critical Care Medicine 1992 erstmals entwickelt (1) und ist seither international Einschlusskriterium für klinische Studien. Seit 2005 sind diese Kriterien zudem verbindliche diagnostische Kriterien innerhalb des deutschen ICD-10 Klassifikationssystems ([www.dimdi.de](http://www.dimdi.de)). Die im Rahmen der als *Systemic Inflammatory Response Syndrome* (SIRS) bezeichneten systemischen Entzündungsreaktion freigesetzten primären und sekundären Mediatoren bestimmen maßgeblich die pathophysiologischen Folgen der Sepsis. Die multifaktorielle Beeinträchtigung der Gewebesauerstoffversorgung, vermehrte Apoptose sowie die direkte Gewebeschädigung durch freigesetzte Sauerstoffradikale aus aktivierten Leukozyten sind letztlich für die Entwicklung eines Multiorgandysfunktionssyndrom (MODS) verantwortlich, dessen Fortschreiten bei Patienten mit Sepsis die häufigste Todesursache darstellt.

Entscheidend für die Diagnose einer schweren Sepsis ist das Auftreten mindestens einer infektionsbedingten neuen Organfunktionsstörung. Das Ausmaß der Organdysfunktion kann mit Hilfe des SOFA-Scores quantifiziert werden. Die Diagnose *der zugrunde liegenden Infektion* ist bei kritisch kranken Patienten jedoch nicht selten mit Schwierigkeiten verbunden. Positive mikrobiologische Befunde in unterschiedlichen Isolaten (Atemwegssekret, Urin, Wund- und Hautabstrich etc.) sind häufig bei kritisch kranken Patienten und können als klinisch unbedeutende Kolonisation mit mikrobiologischen Erregern oder als klinisch relevante Infektion interpretiert werden. Eine sichere Zuordnung ist bisher nicht möglich und führt zu einer "Übertherapie" mit antimikrobiellen Pharmaka, wodurch Resistenzen, Toxizität und Kosten erheblich gesteigert werden. Auch eine Bakteriämie oder Fungämie - ein Goldstandard der mikrobiologischen Diagnostik der Sepsis - findet sich selbst in klinischen Studien, in denen die Abnahme von Blutkulturen im Protokoll vorgeschrieben werden, nur bei durchschnittlich 30% von Patienten mit schwerer Sepsis oder septischem Schock (2-4). Im klinischen Alltag beträgt diese Rate sogar nur 10% (5). Insgesamt kann in ca. 30 % - 50 % kein mikrobiologisch gesicherter Infektionsnachweis geführt werden, obwohl eine Infektion nach klinischen Kriterien hochwahrscheinlich ist (6-8). Kritisch kranke Patienten auf der Intensivstation entwickeln zudem häufig Fieber, eine Leukozytose und eine Erhöhung des C-reaktiven Proteins, ohne dass eine Infektion als Ursache nachgewiesen werden kann.



Moderne molekularbiologische Diagnoseverfahren könnten geeignet sein, ein SIRS infektiöser von einem SIRS nichtinfektiöser Genese. So erlauben Transkriptom-basierte Verfahren mittels differenzieller Genexpressionsanalyse die Zustandsbeschreibung der Aktivierung leukozytärer Gene. In diesem Zusammenhang war es möglich, die molekularen Mechanismen der systemischen Inflammation bei Patienten mit koronarchirurgischen Eingriffen mit und ohne Herz-Lungen-Maschine zu beschreiben (9). In vitro konnten unterschiedliche Gen-Expressionen zwischen unstimulierten Leukozyten und mit Gram-positiven bzw. Gram-negativen Erregern stimulierte Leukozyten nachgewiesen werden (10). Bei Patienten mit schwerer Sepsis war es möglich, charakteristische Genexpressionsprofile zu erstellen (11-14). In einer weiteren Studie konnte gezeigt werden, dass mit diesem Verfahren auch Infektionen durch verschiedene Erreger differenziert werden können (15). In einer vorangegangenen Studie mit einem speziell entwickelten Microarray (SIRS-Lab GmbH, Jena) für die differenzielle Genexpressionsanalyse mehrerer tausend inflammationsrelevanter Gene war es möglich, spezifische Genexpressionsprofile für ein SIRS unterschiedlicher Genesen zu erstellen (unpubliziert). Jedoch ist diese Technologie zu aufwendig für die tägliche Diagnostik auf der Intensivstation. Daher wurden aus dem Datenpool sieben Gene identifiziert, mit deren Aktivierungsgrad eine Unterscheidung eines SIRS infektiöser von nicht-infektiöser Genese am besten möglich war. Dieser Test (SIGNATURE®-Test, SIRS-Lab GmbH) erlaubt eine Bestimmung innerhalb eines Arbeitstages und erlaubt eine einfache klinische Interpretation mit Hilfe eines Scores.

Ein weiterer Baustein in der Sepsis-Diagnostik ist der Nachweis des die Infektion verursachenden Erregers. Die gegenwärtig verwendeten kulturbasierten Verfahren liefern ein Ergebnis jedoch erst nach mehreren Tagen. Der behandelnde Arzt muss seine Therapie daher zunächst ohne Kenntnis des mikrobiologischen Befundes einleiten. Mittels PCR ist es möglich, mikrobielle DNA im Blut von Patienten nachzuweisen. Bisherige Daten sind viel versprechend, da eine höhere Sensitivität in der Detektion der Pathogene gezeigt werden konnte und die Ergebnisse schneller vorlagen (16, 17). Darüber hinaus konnte nachgewiesen werden, dass der Nachweis von mikrobieller DNA im Blut einen signifikanten Befund darstellt und Patienten mit hoher Krankheitsschwere identifiziert (18). Mit dem VYOO®-Test (SIRS-Lab GmbH, Jena) steht nun eine PCR basierte Methode zur Pathogenidentifizierung zur Verfügung, die 40 verschiedene Erreger nachweisen kann.

Trotz bisher viel versprechender Ergebnisse ist die Datenlage noch gering und die Interpretation und Anwendung der Testergebnisse daher schwer. In der vorliegenden Studie soll daher untersucht werden, in wie weit Ergebnisse des SIGNATURE®-Tests durch den klinischen

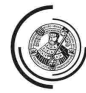

Verlauf des Patienten bestätigt werden und in wie weit der VYOO®-Test bei positivem SIGNATURE®-Test zusätzliche Erkenntnisse liefern kann.

### **3 Studienziele**

#### **3.1 Primäres Ziel**

Als primäres Studienziel ist zu prüfen, ob der SIGNATURE®-Test die Entwicklung eines SIRS infektiöser Genese (Sepsis) bei Hochrisikopatienten korrekt und frühzeitiger wiedergibt als konventionelle Inflammations- bzw. Sepsismarker. Dazu soll der SIQ-Score® mit der klinischen Diagnose (SIRS, Sepsis, schwere Sepsis, septischer Schock) im zeitlichen Verlauf korreliert werden.

#### **3.2 Sekundäre Ziele**

In den sekundären Studienzielen soll untersucht werden

- Korrelation von SIGNATURE® mit Organdysfunktionen (SOFA-Score)
- Korrelation von SIGNATURE® mit Inflammationsmarkern
- Korrelation von SIGNATURE® mit ITS-Liegezeit und ITS/Krankenhaus-Letalität
- Häufigkeit positiver VYOO®-Tests bei positivem SIGNATURE®
- Korrelation VYOO® mit Blutkultur
- Korrelation VYOO® mit anderen mikrobiologischen Nachweisen vom Ort der Infektion
- Korrelation von VYOO® mit Organdysfunktionen (SOFA-Score)
- Korrelation von VYOO® mit Inflammationsmarkern
- Korrelation von VYOO® mit ITS-Liegezeit und ITS/Krankenhaus-Letalität

### **4 Studienbeschreibung**

#### **4.1 Studiendesign**

Die Studie wird als prospektive, monozentrische, unkontrollierte Kohortenstudie durchgeführt. Es sollen 500 Patienten in die Studie eingeschlossen werden. Dabei sollen maximal 10 Patienten mit Z. n. Transplantation eingeschlossen werden, da die Validität des SIGNATURE®-Tests bei Immunsuppression fraglich ist. Weitere Patienten dieses Kollektivs werden nur nach einer Zwischenanalyse dieser 10 Patienten eingeschlossen.

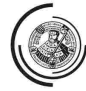

## 4.2 Erwartete Studiendauer

Die individuelle Studiendauer beträgt maximal 10 Tage, sofern der Patient solange auf der Intensivstation liegt. Sollte ein Studienpatient länger als 10 Tage auf der Intensivstation verbleiben, so können zusätzliche Studientage anfallen, sofern der Patient eine Sepsis entwickelt. Eine Nachbeobachtung ist nicht vorgesehen. Bei einer Rekrutierungsrate von ca. 20 Patienten pro Monat wird von einer Rekrutierungszeit 24 Monaten ausgegangen. Für die folgende biometrische Analyse und Verfassung der Publikation ist ein Zeitraum von 3 Monaten vorgesehen. Danach ist die Studie formal beendet.

## 5 Studienpopulation

### 5.1 Einschlusskriterien

Für den Einschluss in die Studie müssen alle Kriterien erfüllt sein.

- ITS-Aufnahme aufgrund einer der folgenden Erkrankungen
  - Hohes Risiko für die Entwicklung einer Sepsis:
    - Leber-Transplantation
    - Niere-Pankreastransplantation
    - Ösophagusresektion
    - Pankreaskopfresektion (z.B. Whipple-OP)
    - Notfalllaparotomie (einschl. diagnostischer Laparotomie)
    - Kardiochirurgischer Kombinationseingriff
      - Aufnahme über die Zentrale Notaufnahme
  - Wiederaufnahme eines ITS-Patienten
- Oder*
- Patienten mit manifester Infektion
  - Endokarditis
  - Pneumonie
  - Schwere Sepsis/ septischer Schock (nicht älter als 48 Std.)

### 5.2 Ausschlusskriterien

Für den Einschluss in die Studie darf keines der folgenden Kriterien erfüllt sein

- Alter <18 Jahre
- Schwangere oder stillende Frauen
- Einverständniserklärung nicht einholbar

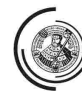

- Patienten mit Therapieeinschränkung (z.B. DNR)
- Patienten mit infauster Prognose

## 6 Individueller Studienablauf

### 6.1 Prüfung der Ein- und Ausschlusskriterien

Nur Patienten, die alle Einschlusskriterien und keines der Ausschlusskriterien erfüllen, können in die Studie aufgenommen werden. Die Entscheidung zum Studieneinschluss erfolgt durch den diensthabenden Oberarzt der Intensivstation bzw. durch die Studienkoordinatoren.

### 6.2 Einwilligungserklärung

Nach Prüfung der Ein- und Ausschlusskriterien erfolgt die Aufklärung und Einholung der Einwilligungserklärung. Diese wird mittels vorgefertigter Formulare durchgeführt.

#### 6.2.1 Aufklärung und Einwilligungserklärung einwilligungsfähiger Patienten

Einwilligungsfähige Patienten werden vor der Studie mündlich und schriftlich aufgeklärt. Der Patient erteilt darin seine schriftliche Einwilligung, an der Studie teilzunehmen.

#### 6.2.2 Aufklärung und Einwilligungserklärung nicht einwilligungsfähiger Patienten

Es ist davon auszugehen, dass es sich wegen der Schwere der Erkrankung bei den einzuschließenden Studienpatienten größtenteils um nicht einwilligungsfähige Patienten handelt. In diesem Fall wird eine mündliche oder schriftliche Einwilligungserklärung des Patienten vor Beginn der Studie nicht einzuholen sein.

Bei fehlender Einwilligungsfähigkeit soll eine schriftliche Einwilligung eines gesetzlichen Betreuers (Aufgabenkreis Gesundheitsfürsorge) des Patienten eingeholt werden. Liegt bei Studieneinschluss noch keine Betreuung vor, so wird der mutmaßliche Wille des Patienten bei den Angehörigen erfragt.

**Kann jedoch innerhalb einer angemessenen Frist ein Einverständnis nicht eingeholt werden oder erfolgt ein Widerspruch des Betreuers oder Angehörigen, wird die Teilnahme des Patienten an der Studie sofort beendet. Alle bis dahin entnommenen Blutproben werden vernichtet.**

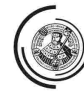

### **6.2.3 Rücknahme der Einwilligung**

Patienten bzw. deren Betreuer können jederzeit und ohne Angabe von Gründen ihre Einwilligung zurückziehen und die Teilnahme an der Studie abbrechen. In diesem Fall werden alle Studiendaten unverzüglich gelöscht und noch nicht verarbeitete Proben vernichtet.

### **6.2.4 Nachträgliche Feststellung von Verletzungen der Ein- und Ausschlusskriterien**

Wird nachträglich festgestellt, dass zum Zeitpunkt des Studieneinschlusses eine Verletzung der Ein- und Ausschlusskriterien vorlag, so wird der Patient aus der Studie ausgeschlossen.

## **6.3 Beschreibung des Studienablaufes**

Die Visiten sind nur dann durchzuführen, sofern der Patient noch auf der Intensivstation behandelt wird.

### **6.3.1 Visite nach Studieneinschluss (Baseline)**

- Entnahme für SIGNATURE®, bei elektiven chirurgischen Patienten erfolgt die Abnahme präoperativ nach Einleitung der Narkose
- Entnahme für VYOO®, sofern eine Blutkultur aus medizinischer Indikation (z. B. neue Infektion) entnommen wird.
- Erhebung der demographischen Daten
- Erhebung der Diagnosen und Nebendiagnosen
- Erhebung der operativen Eingriffe
- Berechnung des SAPS-II und des APACHE-II-Score
- Erhebung der Begleitmedikation (insbesondere Antibiotika)
- Erhebung von Infektionen und des Sepsis-Status (SIRS, Sepsis, schwere Sepsis, septischer Schock)
- Erhebung der Ergebnisse mikrobiologischer Untersuchungen (einschließlich Resistenzspektrum)
- Erhebung bestehender Organdysfunktionen (Berechnung des SOFA-Score)
- Erhebung des täglichen Routine-Labors (insbesondere inflammationsrelevante Parameter einschließlich Procalcitonin)

### **6.3.2 Visiten Tag 1-9 nach Studieneinschluss**

Bei Patienten ohne SIRS-Kriterien, ohne Anhalt für eine Infektion und einem SOFA  $\leq 4$  wird die Visite nicht durchgeführt.



- Entnahme für SIGNATURE®.
- Entnahme für VYOO®, sofern eine Blutkultur aus medizinischer Indikation (z. B. neue Infektion) entnommen wird.
- Erhebung der operativen Eingriffe
- Erhebung der Begleitmedikation (insbesondere Antibiotika)
- Erhebung von Infektionen und des Sepsis-Status (SIRS, Sepsis, schwere Sepsis, septischer Schock)
- Erhebung der Ergebnisse mikrobiologischer Untersuchungen (Einschließlich Resistenzspektrum)
- Erhebung bestehender Organdysfunktionen (Berechnung des SOFA-Score)
- Erhebung des täglichen Routine-Labors (insbesondere inflammationsrelevante Parameter einschließlich Procalcitonin)

### 6.3.3 Visiten nach Tag 9 bei einer neu aufgetretenen Sepsis

Im Falle einer neu aufgetretenen Sepsis beginnt erneut ein Abnahmezyklus von max. 10 Tagen wie unter 6.3.1 und 6.3.2 beschrieben.

## 7 Verfahren zur Diagnostik und Datengewinnung

### 7.1 Der SIGNATURE®-Test

Der SIGNATURE®-Test (SIRS-Lab GmbH, Jena) erlaubt die Unterscheidung eines SIRS infektiöser und nicht-infektiöser Genese mittels Genexpressionsanalyse. Für die Testdurchführung ist die Abnahme von Vollblut in ein PaxGene®-Röhrchen notwendig. Das PaxGene®-Röhrchen wird unmittelbar nach Befüllung eingefroren.

Die Testdurchführung erfolgt in der SIRS-Lab GmbH Jena. Aus dem Vollblut wird zunächst die leukozytäre RNA isoliert. Mittels Multiplex-PCR wird die RNA von sieben inflammationsrelevanten Genen bestimmt und ausgewertet. Aus den Testergebnissen wird ein Score (SIQ-Score) berechnet. Der SIQ-Score kann Werte zwischen -50 und +50 einnehmen. Negative Score-Werte stehen für ein SIRS nicht-infektiöser Genese und positive Score-Werte für ein SIRS infektiöser Genese. Dabei liegen Werte zwischen -6,5 und +6,5 in einem indifferenten Bereich (Konvergenzzone).



## 7.2 Der VYOO®-Test

Der VYOO®-Test erlaubt den Nachweis mikrobieller DNA sowie einiger bakterieller Resistenzgenen (siehe Tabelle 1) aus dem Blut. Für die Testdurchführung ist die Blut-Entnahme durch eine frische venöse Punktion unter sterilen Bedingungen in ein 5 ml EDTA-Röhrchen notwendig. Die Blutentnahme soll zeitgleich mit der Blutkultur und über die gleiche Punktionsstelle erfolgen, so dass für Blutkulturen und VYOO® nur eine einzige Punktion notwendig ist. Die Bestimmungen mittels Multiplex-PCR erfolgen im Institut für Medizinische Mikrobiologie des Universitätsklinikum Jena.

**Tabelle 1:** Spezies und Resistenzen nachweisbar mittels VYOO® (Target-Liste)

| Bakterien               |                              | Pilze                 | Resistenzen               |
|-------------------------|------------------------------|-----------------------|---------------------------|
| Acinetobacter baumannii | Prevotella melanogenica      | Aspergillus fumigatus | Vancomycin <i>vanA</i>    |
| Bacillus cereus         | Proteus mirabilis            | Candida albicans      | Vancomycin <i>vanB</i>    |
| Bacteroides fragilis    | Pseudomonas aeruginosa       | Candida glabrata      | Vancomycin <i>vanC</i>    |
| Burkholderia cepacia    | Serratia marcescens          | Candida krusei        | β-Laktamase <i>blaSHV</i> |
| Clostridium perfringens | Staphylococcus aureus        | Candida parapsilosis  | Methicillin <i>mecA</i>   |
| Enterobacter aerogenes  | Staphylococcus epidermidis   | Candida tropicalis    |                           |
| Enterobacter cloacae    | Staphylococcus haemolyticus  | Fungi spp.            |                           |
| Enterococcus faecalis   | Staphylococcus hominis       |                       |                           |
| Enterococcus faecium    | Staphylococcus saprophyticus |                       |                           |
| Escherichia coli        | Stenotrophomonas maltophilia |                       |                           |
| Haemophilus influenzae  | Streptococcus agalactiae     |                       |                           |
| Klebsiella oxytoca      | Streptococcus dysgalactiae   |                       |                           |
| Klebsiella pneumoniae   | Streptococcus bovis          |                       |                           |
| Morganella morganii     | Streptococcus mutans         |                       |                           |
| Neisseria meningitidis  | Streptococcus pneumoniae     |                       |                           |
| Prevotella buccae       | Streptococcus pyogenes       |                       |                           |
| Prevotella intermedia   | Streptococcus sanguinis      |                       |                           |

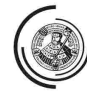

## 8 Dokumentation

Der überwiegende Anteil der zu erfassenden Daten wird routinemäßig bei Intensivpatienten erhoben. Die Dokumentation studienrelevanter Daten in eine Datenbank erfolgt durch die Studienschwestern der Studieneinrichtung. Die Art der zu dokumentierenden Daten ergibt sich aus den Visiten (siehe Kapitel 6.3).

## 9 Literatur

1. ACCP/SCCM Consensus Conference Committee: Definition for sepsis and organ failure and guidelines for the use of innovative therapies in sepsis. *Crit. Care Med.* 1992; 20(6):864-874
2. Bates DW, Cook EF, Goldman L, Lee TH: Predicting bacteremia in hospitalized patients. A prospectively validated model. *Ann Intern Med* 1990; 113:495-500
3. Bates DW, Sands K, Miller E, et al: Predicting bacteremia in patients with sepsis syndrome. Academic Medical Center Consortium Sepsis Project Working Group. *J Infect Dis* 1997; 176:1538-51
4. Crowe M, Ispahani P, Humphreys H, Kelley T, Winter R: Bacteraemia in the adult intensive care unit of a teaching hospital in Nottingham, UK, 1985-1996. *Eur J Clin Microbiol Infect Dis* 1998; 17:377-84
5. Engel C, Brunkhorst FM, Bone HG, et al: Epidemiology of sepsis in Germany: results from a national prospective multicenter study. *Intensive Care Med* 2007; 33:606-18
6. Alberti C, Brun-Buisson C, Burchardi H, et al: Epidemiology of sepsis and infection in ICU patients from an international multicentre cohort study. *Intensive Care Med* 2002; 28:108-21
7. Brunkhorst FM, Welte T, Stüber F, et al: Microbiologically proven infection among patients with clinical evidence of infections - results from the German prevalence study. *Infection* 2005; 33:47A
8. Vincent JL, Bihari DJ, Suter PM, et al: The prevalence of nosocomial infection in intensive care units in Europe. Results of the European Prevalence of Infection in Intensive Care (EPIC) Study. EPIC International Advisory Committee. *Jama* 1995; 274:639-44
9. Tomic V, Russwurm S, Moller E, et al: Transcriptomic and proteomic patterns of systemic inflammation in on-pump and off-pump coronary artery bypass grafting. *Circulation* 2005; 112:2912-20
10. Feezor RJ, Oberholzer C, Baker HV, et al: Molecular characterization of the acute inflammatory response to infections with gram-negative versus gram-positive bacteria. *Infect Immun* 2003; 71:5803-13
11. Tang BM, McLean AS, Dawes IW, Huang SJ, Lin RC: The use of gene-expression profiling to identify candidate genes in human sepsis. *Am J Respir Crit Care Med* 2007; 176:676-84
12. Payen D, Lukaszewicz AC, Belikova I, et al: Gene profiling in human blood leucocytes during recovery from septic shock. *Intensive Care Med* 2008; 34:1371-6
13. Pachot A, Lepape A, Vey S, et al: Systemic transcriptional analysis in survivor and non-survivor septic shock patients: a preliminary study. *Immunol Lett* 2006; 106:63-71
14. O'Dwyer MJ, Mankan AK, Stordeur P, et al: The occurrence of severe sepsis and septic shock are related to distinct patterns of cytokine gene expression. *Shock* 2006; 26:544-50
15. Ramilo O, Allman W, Chung W, et al: Gene expression patterns in blood leukocytes discriminate patients with acute infections. *Blood* 2007; 109:2066-77
16. Lehmann LE, Hunfeld KP, Emrich T, et al: A multiplex real-time PCR assay for rapid detection and differentiation of 25 bacterial and fungal pathogens from whole blood samples. *Med Microbiol Immunol* 2007;

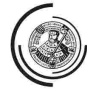

17. Louie RF, Tang Z, Albertson TE, et al: Multiplex polymerase chain reaction detection enhancement of bacteremia and fungemia. *Crit Care Med* 2008; 36:1487-92
18. Bloos F, Hinder F, Becker K, et al: A multicentre trial to compare blood culture with polymerase chain reaction in severe human sepsis. *Am J Respir Crit Care Med* 2008; submitted:
